# Supplementary material for: An ultra-stable Mn-based Prussian blue compound effectively suppresses Jahn–Teller distortion as a superior cathode material for sodium-ion batteries
Source: Royal Society of Chemistry journal article supplement (doi:10.1039/d4ta05525j), 2024-01-01
Supplement: d4ta05525j1.pdf [file d4ta05525j1.pdf]

## Supporting Information

### **Ultra-stable Mn-based Prussian Blue Compound Effectively Suppresses Jahn-Teller Distortion as Superior Cathode Material for Sodium-ion Batteries**

Xiangyu Ding,<sup>a</sup> Qingbo Zhou,<sup>a</sup> Ziyi Wang,<sup>a</sup> Lei Liu,<sup>a</sup> Yusong Wang,<sup>a, b</sup> Tinglu Song,<sup>c</sup>  
Feng Wu,<sup>a</sup> Hongcai Gao,<sup>a, b, d\*</sup>

<sup>a</sup> School of Materials Science and Engineering, Beijing Institute of Technology, Beijing, 100081, China

<sup>b</sup> Yangtze Delta Region Academy of Beijing Institute of Technology, Jiaxing, 314019, China

<sup>c</sup> Experimental Center of Advanced Materials, School of Materials Science and Engineering, Beijing Institute of Technology, Beijing, 100081, China

<sup>d</sup> Beijing Institute of Technology Chongqing Innovation Center, Chongqing, 401120, China

\*Corresponding author at School of Materials Science and Engineering, Beijing Institute of Technology, Beijing, 100081, China

E-mail address: gaohc@bit.edu.cn (H. Gao)

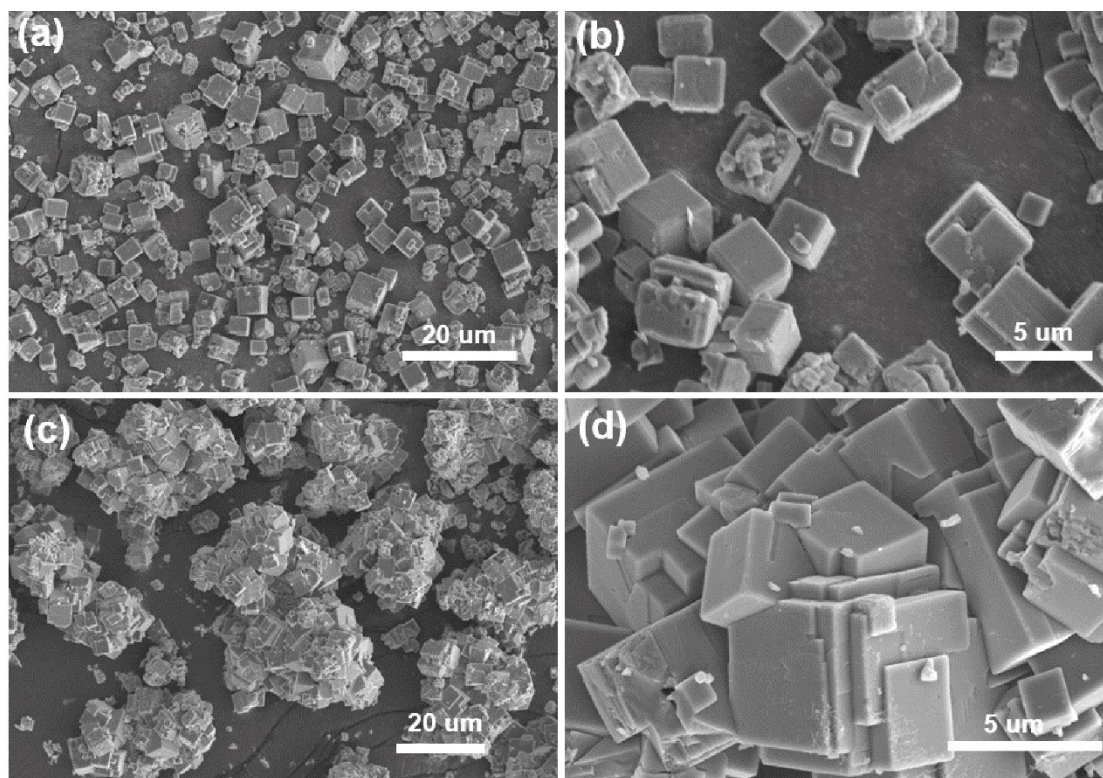

Fig. S1 (a-b) SEM images of the NaMHCF-2 at different magnifications; (c-d) SEM images of the NaMHCF-3 at different magnifications.

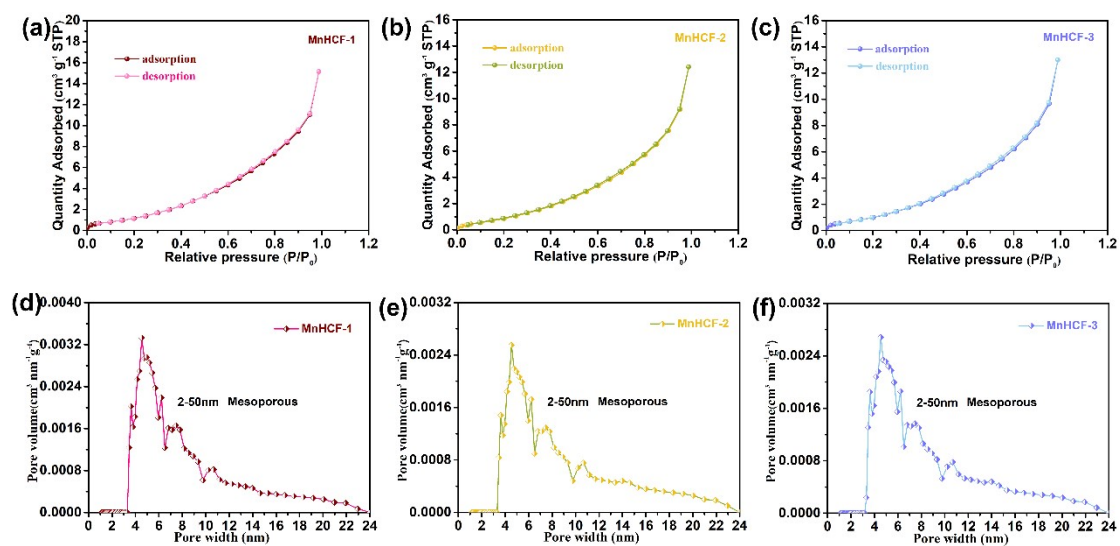

Fig. S2 (a-c)  $N_2$  adsorption-desorption isotherms of MHCF-1, MHCF-2, MHCF-3; (d-f) Pore size distribution of MHCF-1, MHCF-2, MHCF-3.

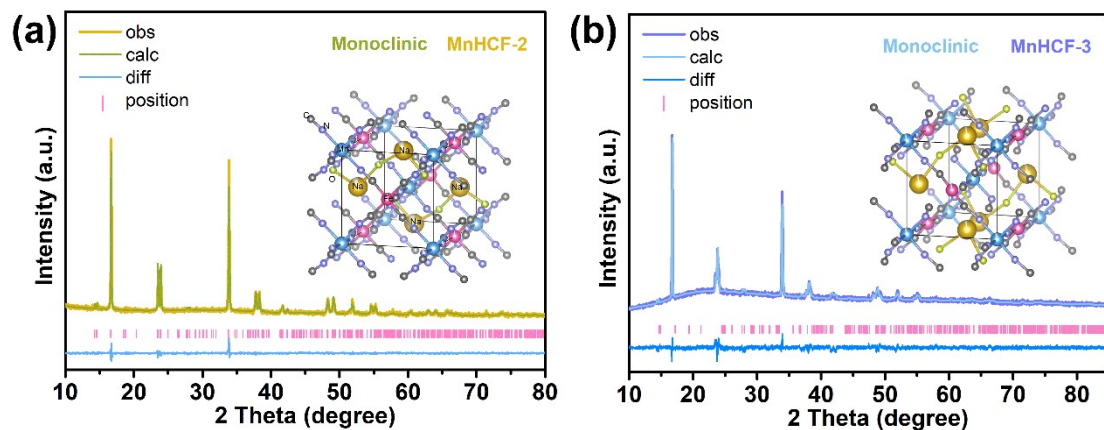

Fig. S3 The Rietveld refinements of the monoclinic phase (a) MnHCF-2; (b) MnHCF-3.

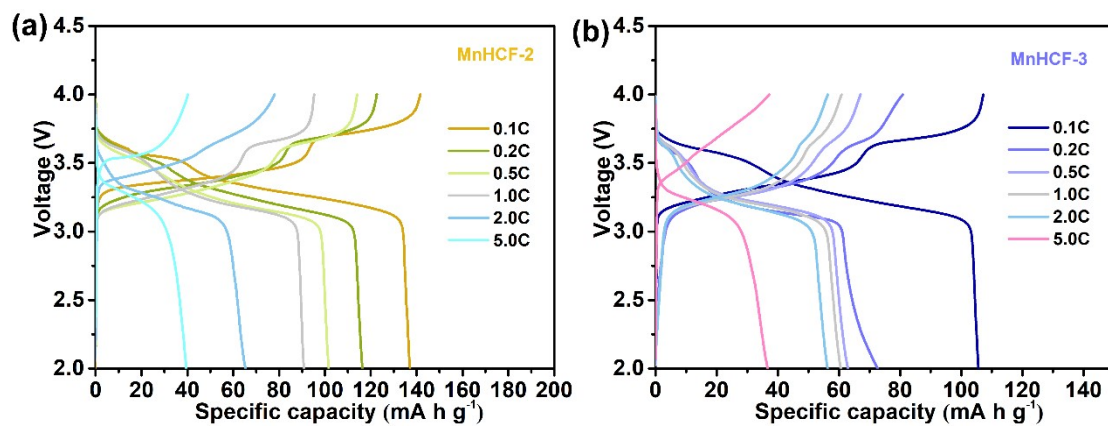

Fig. S4 Charge and discharge curves at different current densities (a) MnHCF-2; (b) MnHCF-3.

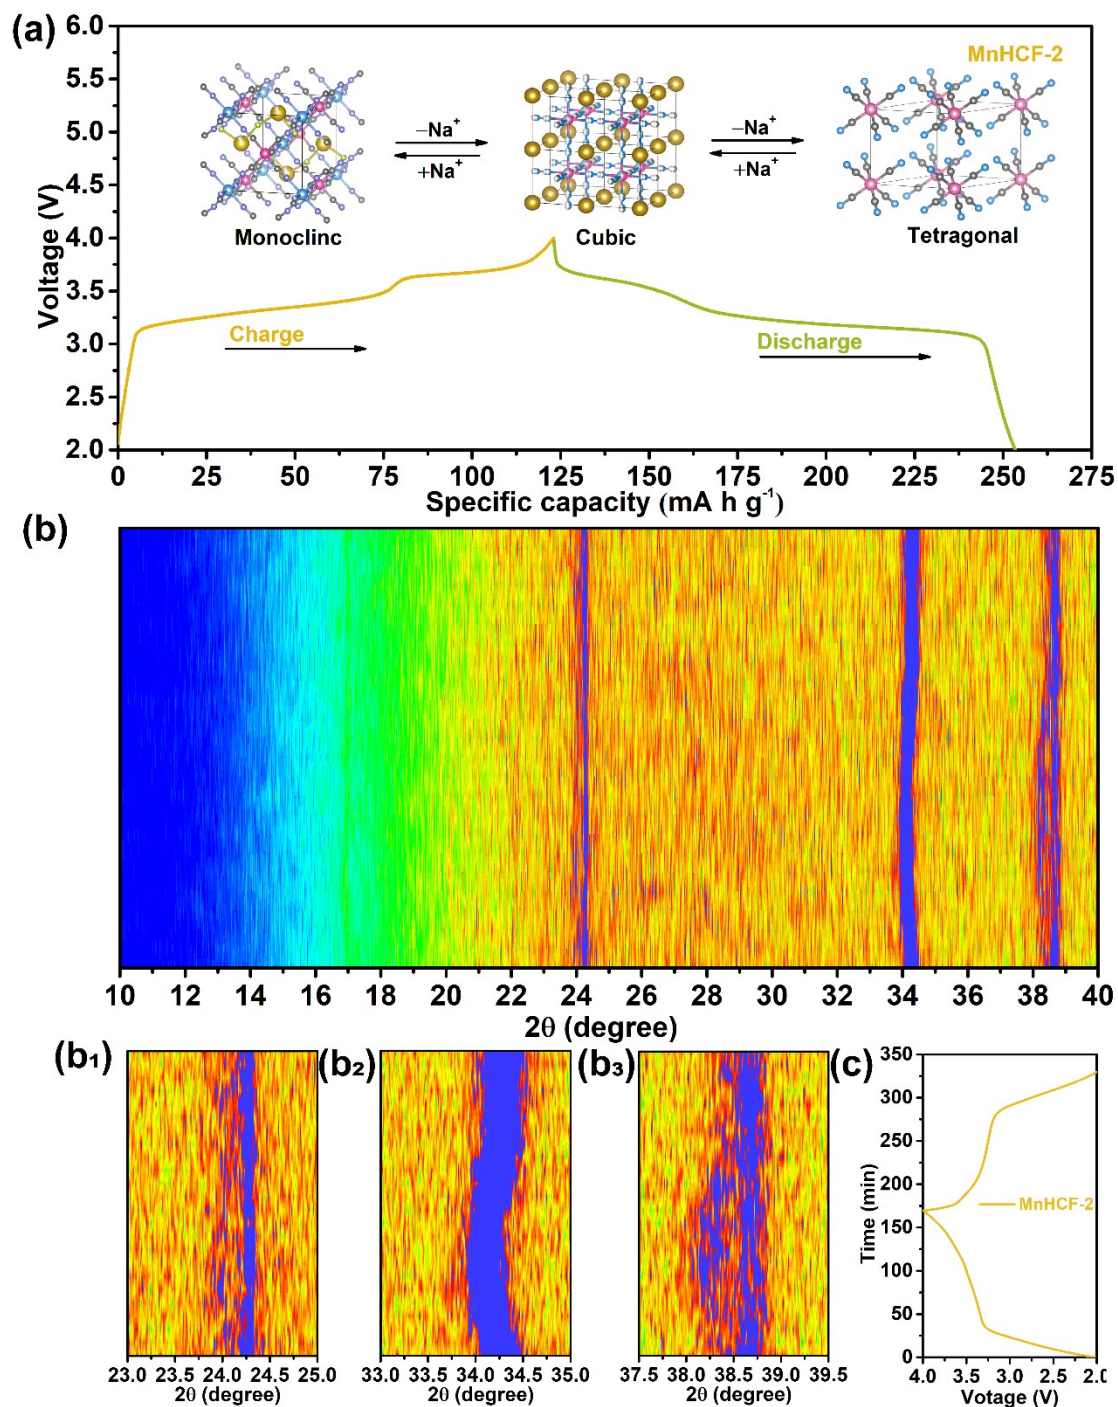

Fig. S5 (a) Galvanostatic charge/discharge voltage curve and schematic illustration of structural phase transformation of MnHCF-2; (b) In situ XRD patterns in intensity contour maps of MnHCF-1; (b<sub>1</sub>-b<sub>3</sub>) A partial enlargement of figure b; (c) the corresponding galvanostatic charge/discharge voltage curves at 0.2 C.

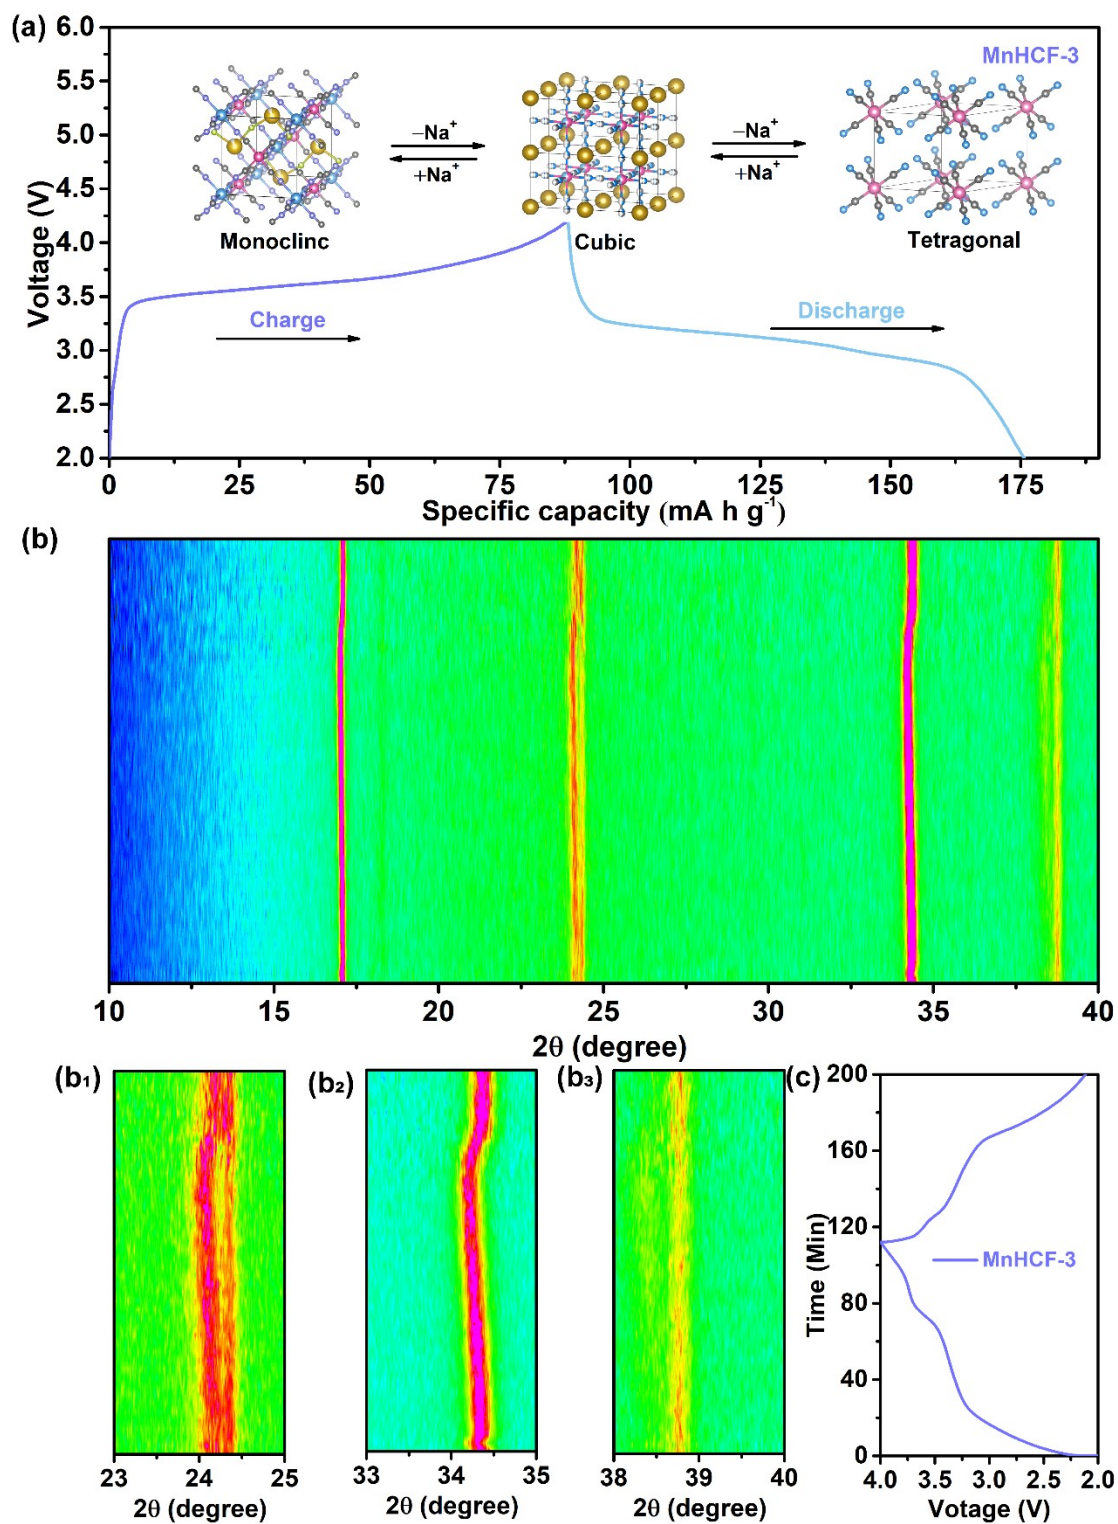

Fig. S6 (a) Galvanostatic charge/discharge voltage curve and schematic illustration of structural phase transformation of MnHCF-3; (b) In situ XRD patterns in intensity contour maps of MnHCF-1; (b<sub>1</sub>-b<sub>3</sub>) A partial enlargement of figure b; (c) the corresponding galvanostatic charge/discharge voltage curves at 0.2 C

Table S1 Structure Parameters of MnHCF-1

| Pm/3m Cubic a=b=c=5.25620 Å, $\alpha=\gamma=\beta=90^\circ$ |         |         |         |      |
|-------------------------------------------------------------|---------|---------|---------|------|
| Atom                                                        | x       | y       | z       | Site |
| Na1                                                         | 0.00000 | 0.00000 | 0.00000 | 1a   |
| Fe1                                                         | 0.50000 | 0.50000 | 0.50000 | 1b   |
| Mn1                                                         | 0.50000 | 0.50000 | 0.50000 | 1b   |
| C1                                                          | 0.50000 | 0.08624 | 0.50000 | 4m   |
| N1                                                          | 0.50000 | 0.08300 | 0.50000 | 4m   |

Table S2 Structure Parameters of MnHCF-2

| P21/n Monoclinic a=10.5467 Å, b=7.5016 Å, c=7.4116 Å, $\alpha=\gamma=90^\circ$ , $\beta=91.3770^\circ$ |         |         |         |      |
|--------------------------------------------------------------------------------------------------------|---------|---------|---------|------|
| Atom                                                                                                   | x       | y       | z       | Site |
| Mn                                                                                                     | 0.50000 | 0.50000 | 0.50000 | 2a   |
| Fe                                                                                                     | 0.50000 | 0.00000 | 1.00000 | 2d   |
| C1                                                                                                     | 0.49338 | 0.18403 | 0.81012 | 4e   |
| C2                                                                                                     | 0.22367 | 0.51529 | 0.54315 | 4e   |
| C3                                                                                                     | 0.49083 | 0.16830 | 0.18496 | 4e   |
| N1                                                                                                     | 0.49940 | 0.30420 | 0.72200 | 4e   |
| N2                                                                                                     | 0.29070 | 0.49680 | 0.49710 | 4e   |
| N3                                                                                                     | 0.49930 | 0.29050 | 0.29500 | 4e   |
| O1                                                                                                     | 0.25070 | 0.21250 | 0.29150 | 4e   |
| Na1                                                                                                    | 0.24880 | 0.44010 | 0.04180 | 4e   |

Table S3 Structure Parameters of MnHCF-3

| P21/n Monoclinic a=10.53440 Å, b=7.53540 Å, c=7.37630 Å, $\alpha=\gamma=90^\circ$ , $\beta=90.4190^\circ$ |         |         |         |      |
|-----------------------------------------------------------------------------------------------------------|---------|---------|---------|------|
| Atom                                                                                                      | x       | y       | z       | Site |
| Mn                                                                                                        | 0.50000 | 0.50000 | 0.50000 | 2a   |
| Fe                                                                                                        | 0.50000 | 0.00000 | 1.00000 | 2d   |
| C1                                                                                                        | 0.42618 | 0.28930 | 0.78334 | 4e   |

|     |         |         |          |    |
|-----|---------|---------|----------|----|
| C2  | 0.23710 | 0.48944 | 0.52438  | 4e |
| C3  | 0.48944 | 0.13961 | 0.16125  | 4e |
| N1  | 0.49896 | 0.29271 | 0.70242  | 4e |
| N2  | 0.27207 | 0.49827 | 0.51144  | 4e |
| N3  | 0.50322 | 0.30102 | 0.29598  | 4e |
| O1  | 0.23007 | 0.26243 | 0.29274  | 4e |
| Na1 | 0.28431 | 0.46595 | -0.01155 | 4e |

Table S4 The bulk atomic ratio obtained from ICP-OES and TGA of the samples of MnHCF-1, MnHCF-2, and MnHCF-3.

| Quality weight<br>(wt%) | Na    | Mn | Fe    | □     | H <sub>2</sub> O |
|-------------------------|-------|----|-------|-------|------------------|
| MnHCF-1                 | 1.217 | 1  | 0.862 | 0.138 | 1.99             |
| MnHCF-2                 | 1.139 | 1  | 0.813 | 0.187 | 2.78             |
| MnHCF-3                 | 1.143 | 1  | 0.417 | 0.583 | 5.68             |

Table S5 Comparison table of previously reported Mn-based PBA electrodes and this work.

|          | 10 mA g <sup>-1</sup>   | 25 mA g <sup>-1</sup>     | 50 mA g <sup>-1</sup>     | 100 mA g <sup>-1</sup>    | References   |
|----------|-------------------------|---------------------------|---------------------------|---------------------------|--------------|
| C-MnHCF  |                         | 123.8 mAh g <sup>-1</sup> | 117.2 mAh g <sup>-1</sup> | 110.2 mAh g <sup>-1</sup> | <sup>1</sup> |
| M-MnHCF  |                         | 140.0 mAh g <sup>-1</sup> | 125.0 mAh g <sup>-1</sup> | 110.0 mAh g <sup>-1</sup> | <sup>1</sup> |
| L-PBM    | 150 mAh g <sup>-1</sup> |                           | 138.0 mAh g <sup>-1</sup> | 130.0 mAh g <sup>-1</sup> | <sup>2</sup> |
| EDTA-NMF |                         | 137.0 mAh g <sup>-1</sup> | 129.0 mAh g <sup>-1</sup> | 119.0 mAh g <sup>-1</sup> | <sup>3</sup> |
| Na-MnHCF |                         | 100.0 mAh g <sup>-1</sup> | 70.0 mAh g <sup>-1</sup>  | 40.0 mAh g <sup>-1</sup>  | <sup>4</sup> |

|         |                              |                               |                               |                                |              |
|---------|------------------------------|-------------------------------|-------------------------------|--------------------------------|--------------|
| NMF HFC | 105.0 mAh<br>g <sup>-1</sup> | 90.0 mAh g <sup>-1</sup><br>1 | 85.0 mAh g <sup>-1</sup><br>1 | 65.0 mAh g <sup>-1</sup>       | <sup>5</sup> |
| MnHCF-1 | 159.2 mAh<br>g <sup>-1</sup> | 128.5 mAh<br>g <sup>-1</sup>  | 120.3 mAh<br>g <sup>-1</sup>  | 116.4 mAh g <sup>-1</sup><br>1 | This work    |

## References

- 1 Y. Tang, W. Li, P. Feng, M. Zhou, K. Wang, Y. Wang, K. Zaghbi and K. Jiang, *Adv. Funct. Mater.*, 2020, **30**, 1908754.
- 2 F. Peng, L. Yu, P. Gao, X.-Z. Liao, J. Wen, Y.-s. He, G. Tan, Y. Ren and Z.-F. Ma, *J. Mater. Chem. A*, 2019, **7**, 22248-22256.
- 3 Y. Shang, X. Li, J. Song, S. Huang, Z. Yang, Z. J. Xu and H. Y. Yang, *Chem*, 2020, **6**, 1804-1818.
- 4 Y. Mao, Y. Chen, J. Qin, C. Shi, E. Liu and N. Zhao, *Nano Energy*, 2019, **58**, 192-201.
- 5 W. Li, C. Han, W. Wang, Q. Xia, S. Chou, Q. Gu, B. Johannessen, H. Liu and S. Dou, *Adv. Energy Mater.*, 2020, **10**, 1903006.
